# Supplementary material for: UV-induced hydrogen-atom transfer and hydrogen-atom detachment in monomeric 7-azaindole isolated in Ar and n-H2 matrices
Source: Royal Society of Chemistry journal article supplement (doi:10.1039/c7cp01363a), 2017-01-01
Supplement: c7cp01363a1.pdf [file c7cp01363a1.pdf]

**UV-induced hydrogen-atom transfer and hydrogen-atom  
detachment in monomeric 7-azaindole isolated  
in Ar and n-H<sub>2</sub> matrices**

Maciej J. Nowak, Igor Reva, Hanna Rostkowska and Leszek Lapinski

Electronic Supplementary Information

Table S1 The relative energies of prototropic tautomers of 7-azaindole. The energies were calculated at the DFT(B3LYP)/6-311++G(d,p) level.

| STRUCTURE                                                                           | FORM       | $\Delta E / \text{kJ}\cdot\text{mol}^{-1}$ |
|-------------------------------------------------------------------------------------|------------|--------------------------------------------|
| 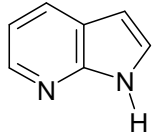   | <b>N1H</b> | 0.0                                        |
|    | <b>N7H</b> | 52.1                                       |
|    | <b>C3H</b> | 62.3                                       |
|    | <b>C2H</b> | 145.7                                      |
|  | <b>C6H</b> | 166.3                                      |
|  | <b>C5H</b> | 167.5                                      |
|  | <b>C4H</b> | 184.5                                      |
|  | <b>C9H</b> | 203.0                                      |
|  | <b>C8H</b> | 203.4                                      |

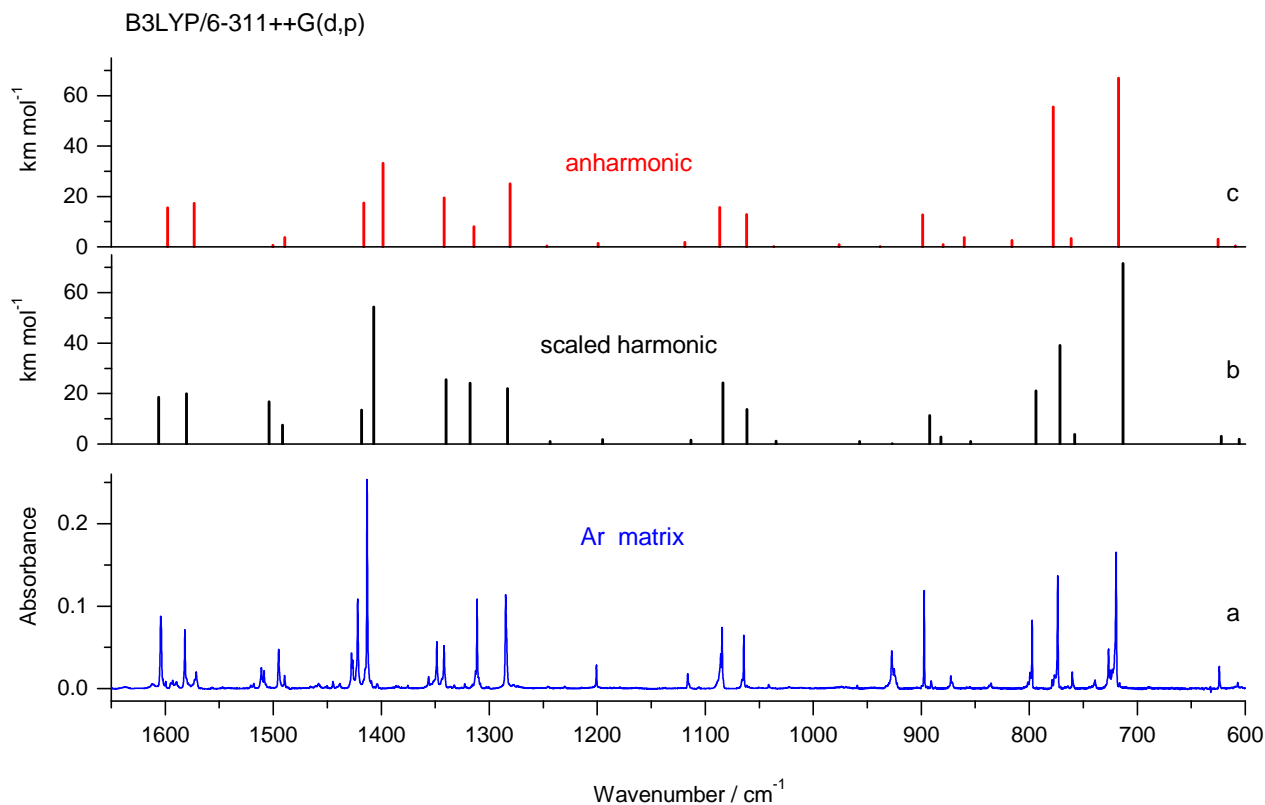

Figure S1. (a) Infrared spectrum of 7-azaindole monomers isolated in an Ar matrix, compared with the theoretical spectra calculated for the **N1H** isomer. Theoretical spectra were computed: (b) within harmonic approximation; (c) taking into account anharmonic effects, as defined in Gaussian 09, Revision D.01. The theoretical harmonic wavenumbers were scaled by a factor of 0.98. The calculations were carried out at the DFT(B3LYP)/6-311++G(d,p) level.

Table S2 Experimental wavenumbers ( $\nu$ ) and relative integrated intensities ( $I$ ) of the bands in the spectra of 7-azaindole monomers isolated in Ar and n-H<sub>2</sub> matrices. The experimental spectra are compared with the theoretical spectrum [wavenumbers ( $\nu$ ) and absolute intensities (A)] calculated, at the DFT(B3LYP)/6-311++G(d,p) level, for the **N1H** tautomer of the compound. The theoretical harmonic wavenumbers were scaled by a single factor of 0.98. Integrated intensities of the experimental bands ( $I$ ) were normalized in such a way that their sum (over all the experimental bands reported in the table) is equal to the sum of absolute intensities of the assigned theoretical bands.

| Ar matrix        |      | H <sub>2</sub> matrix |      | DFT(B3LYP)/6-311++G(d,p) harmonic, scaled |                  | DFT(B3LYP)/6-311++G(d,p) anharmonic. |                  |
|------------------|------|-----------------------|------|-------------------------------------------|------------------|--------------------------------------|------------------|
| <b>N1H</b>       |      |                       |      | <b>N1H</b>                                |                  | <b>N1H</b>                           |                  |
| $\nu$            | $I$  | $\nu$                 | $I$  | $\nu$                                     | A                | $\nu$                                | A                |
| cm <sup>-1</sup> | rel. | cm <sup>-1</sup>      | rel. | cm <sup>-1</sup>                          | $\frac{km}{mol}$ | cm <sup>-1</sup>                     | $\frac{km}{mol}$ |
| 3509/3505        | 99   | 3506                  | 89   | 3590                                      | 89               | 3498                                 | 70               |
|                  |      |                       |      | 3192                                      | 1                | 3121                                 | 4                |
|                  |      |                       |      | 3172                                      | 2                | 3104                                 | 1                |
| 3100             | 4    | 3098                  | 5    | 3128                                      | 18               | 3059                                 | 17               |
| 3071/3067        | 6    | 3066/3061             | 12   | 3106                                      | 11               | 3047                                 | 11               |
| 3035             | 6    | 3039                  | 6    | 3092                                      | 12               | 3017                                 | 11               |
| 1604             | 17   | 1604                  | 15   | 1607                                      | 19               | 1598                                 | 16               |
| 1582             | 11   | 1583/1581             | 15   | 1581                                      | 20               | 1573                                 | 17               |
| 1511/1508        | 8    | 1512/1509             | 9    | 1504                                      | 17               | 1500                                 | 1                |
| 1495             | 8    | 1495                  | 5    | 1492                                      | 8                | 1489                                 | 4                |
| 1422             | 14   | 1423                  | 20   | 1419                                      | 13               | 1416                                 | 17               |
| 1413             | 38   | 1414                  | 30   | 1407                                      | 54               | 1398                                 | 33               |
| 1349/1341        | 22   | 1353/1345             | 16   | 1340                                      | 26               | 1342                                 | 19               |
| 1311             | 17   | 1311                  | 14   | 1318                                      | 24               | 1314                                 | 8                |
| 1285             | 20   | 1284                  | 25   | 1283                                      | 22               | 1281                                 | 25               |
|                  |      |                       |      | 1244                                      | 1                | 1247                                 | 0.4              |
| 1201             | 2    | 1202                  | 2    | 1195                                      | 2                | 1199                                 | 1                |
| 1116             | 2    | 1116                  | 2    | 1114                                      | 1                | 1119                                 | 2                |
| 1086/1084        | 17   | 1088                  | 14   | 1084                                      | 24               | 1087                                 | 15               |
| 1064             | 8    | 1065                  | 5    | 1062                                      | 14               | 1062                                 | 12               |
| 1041             | 1    | 1036                  | 0    | 1035                                      | 1                | 1037                                 | 0.1              |
| 959              | 1    | 963                   | 1    | 958                                       | 1                | 976                                  | 1                |
| 927/925          | 17   | 946                   | 18   |                                           |                  | 962                                  | 21               |
|                  |      |                       |      | 927                                       | 0.1              | 938                                  | 0.2              |
| 897              | 10   | 898                   | 8    | 893                                       | 11               | 899                                  | 13               |
| 891              | 1    | 880                   | 2    | 882                                       | 3                | 880                                  | 1                |
| 872              | 3    | 860                   | 1    | 856                                       | 1                | 861                                  | 4                |
| 799/797          | 12   | 799                   | 18   | 794                                       | 21               | 816                                  | 3                |
| 779/779/773      | 20   | 777                   | 23   | 772                                       | 39               | 778                                  | 56               |
| 760              | 3    | 759                   | 3    | 758                                       | 4                | 761                                  | 3                |
|                  |      | 744                   | 4    |                                           |                  |                                      |                  |
| 719              | 30   | 726                   | 43   | 714                                       | 72               | 718                                  | 67               |
| 624              | 3    | 624                   | 2    | 622                                       | 3                | 626                                  | 3                |
| 607              | < 1  |                       |      | 606                                       | 2                | 610                                  | 0.4              |
| 582              | < 1  | 581                   | 1    | 581                                       | 3                | 585                                  | 3                |
|                  |      |                       |      | 550                                       | 0.5              | 556                                  | 1                |
| 458              | 26   | 467                   | 26   | 460                                       | 51               | 475                                  | 54               |
| 425              | 8    |                       |      | 422                                       | 9                | 426                                  | 9                |
| 417              | 15   |                       |      | 416                                       | 21               | 424                                  | 15               |
|                  |      |                       |      | 236                                       | 0.1              | 242                                  | 0.3              |
|                  |      |                       |      | 215                                       | 15               | 218                                  | 14               |

2 $\gamma$ N1-H overtone

$\gamma$ N1-H

Table S3 Experimental wavenumbers ( $\nu$ ) and relative integrated intensities ( $I$ ) of the bands in the spectrum of **N7H** tautomer generated upon UV ( $\lambda > 270$  nm) irradiation of 7-azaindole monomers isolated in an Ar matrix. The experimental spectrum is compared with the theoretical spectrum [wavenumbers ( $\nu$ ) and absolute intensities (A)] calculated, at the DFT(B3LYP)/6-311++G(d,p) level, for the **N7H** tautomer. The theoretical harmonic wavenumbers were scaled by a single factor of 0.98. Integrated intensities of the experimental bands ( $I$ ) were normalized in such a way that their sum (over all the experimental bands reported in the table) is equal to the sum of absolute intensities of the assigned theoretical bands.

| Ar matrix               |      | DFT(B3LYP)/<br>6-311++G(d,p)<br>harmonic, scaled |                  | DFT(B3LYP)/<br>6-311++G(d,p)<br>anharmonic |                  |
|-------------------------|------|--------------------------------------------------|------------------|--------------------------------------------|------------------|
| <b>N7H</b>              |      | <b>N7H</b>                                       |                  | <b>N7H</b>                                 |                  |
| $\nu$                   | $I$  | $\nu$                                            | A                | $\nu$                                      | A                |
| cm <sup>-1</sup>        | rel. | cm <sup>-1</sup>                                 | $\frac{km}{mol}$ | cm <sup>-1</sup>                           | $\frac{km}{mol}$ |
| 3430/ <u>3427</u> /3423 | 148  | 3510                                             | 75               | 3426                                       | 60               |
|                         |      | 3175                                             | 7                | 3102                                       | 16               |
|                         |      | 3161                                             | 1                | 3089                                       | 1                |
|                         |      | 3140                                             | 10               | 3085                                       | 74               |
|                         |      | 3140                                             | 3                | 3085                                       | 68               |
|                         |      | 3107                                             | 9                | 3025                                       | 12               |
| 1617                    | 31   | 1617                                             | 35               | 1607                                       | 15               |
| 1589                    | 78   | 1589                                             | 56               | 1581                                       | 46               |
| 1517/1513               | 30   | 1509                                             | 51               | 1506                                       | 32               |
|                         |      | 1463                                             | 0.4              | 1466                                       | 4                |
|                         |      | 1450                                             | 9                | 1447                                       | 4                |
| 1401                    | 50   | 1410                                             | 25               | 1402                                       | 13               |
| 1367/ <u>1366</u>       | 43   | 1365                                             | 24               | 1364                                       | 27               |
| 1315                    | 107  | 1313                                             | 125              | 1309                                       | 74               |
| 1272                    | 9    | 1272                                             | 10               | 1273                                       | 5                |
| 1216                    | 11   | 1214                                             | 10               | 1216                                       | 7                |
|                         |      | 1192                                             | 1                | 1199                                       | 1                |
| 1129/1126               | 60   | 1136                                             | 62               | 1135                                       | 42               |
| 1092                    | 18   | 1092                                             | 6                | 1096                                       | 8                |
|                         |      | 1051                                             | 1                | 1054                                       | 1                |
| 1029                    | 23   | 1026                                             | 21               | 1030                                       | 14               |
|                         |      | 938                                              | 2                | 985                                        | 0.03             |
|                         |      | 900                                              | 2                | 937                                        | 9                |
| 904                     | 6    | 899                                              | 5                | 913                                        | 5                |
| 878                     | 9    | 877                                              | 5                | 906                                        | 2                |
|                         |      | 873                                              | 10               | 878                                        | 9                |
|                         |      | 762                                              | 18               | 810                                        | 4                |
|                         |      | 747                                              | 0.07             | 775                                        | 69               |
|                         |      | 736                                              | 2                | 750                                        | 0.1              |
| 727                     | 48   | 721                                              | 117              | 742                                        | 116              |
| 702                     | 28   | 699                                              | 40.              | 733                                        | 73               |
|                         |      | 601                                              | 1                | 621                                        | 1                |
|                         |      | 592                                              | 2                | 606                                        | 1                |
|                         |      | 558                                              | 3                | 593                                        | 1                |
| 552                     | 10   | 550                                              | 6                | 555                                        | 6                |
|                         |      | 419                                              | 7                | 425                                        | 6                |
|                         |      | 384                                              | 11               | 412                                        | 18               |
|                         |      | 245                                              | 9                | 253                                        | 8                |
|                         |      | 209                                              | 1                | 221                                        | 1                |

Table S4 Experimental wavenumbers ( $\nu$ ) and relative integrated intensities ( $I$ ) of the bands in the spectra of **C3H** tautomer generated upon UV ( $\lambda > 270$  nm) irradiation of 7-azaindole monomers isolated in Ar and n-H<sub>2</sub> matrices. The experimental spectra are compared with the theoretical spectrum [wavenumbers ( $\nu$ ) and absolute intensities (A)] calculated, at the DFT(B3LYP)/6-311++G(d,p) level, for the **C3H** tautomer. The theoretical harmonic wavenumbers were scaled by a single factor of 0.98. Integrated intensities of the experimental bands ( $I$ ) were normalized in such a way that their sum (over all the experimental bands reported in the table) is equal to the sum of absolute intensities of the assigned theoretical bands.

| Ar matrix        |      | H <sub>2</sub> matrix |      | DFT(B3LYP)/6-311++G(d,p) harmonic, scaled |                  | DFT(B3LYP)/6-311++G(d,p) anharmonic |                  |
|------------------|------|-----------------------|------|-------------------------------------------|------------------|-------------------------------------|------------------|
| <b>C3H</b>       |      |                       |      | <b>C3H</b>                                |                  | <b>C3H</b>                          |                  |
| $\nu$            | $I$  | $\nu$                 | $I$  | $\nu$                                     | A                | $\nu$                               | A                |
| cm <sup>-1</sup> | rel. | cm <sup>-1</sup>      | rel. | cm <sup>-1</sup>                          | $\frac{km}{mol}$ | cm <sup>-1</sup>                    | $\frac{km}{mol}$ |
|                  |      |                       |      | 3129                                      | 15               | 3049                                | 15               |
|                  |      |                       |      | 3103                                      | 9                | 3039                                | 10               |
|                  |      |                       |      | 3103                                      | 12               | 3019                                | 14               |
|                  |      |                       |      | 3091                                      | 15               | 2996                                | 14               |
|                  |      |                       |      | 2995                                      | 3                | 2895                                | 4                |
|                  |      |                       |      | 2967                                      | 6                | 2886                                | 7                |
|                  |      |                       |      | 1613                                      | 18               | 1608                                | 14               |
|                  |      |                       |      | 1581                                      | 5                | 1574                                | 68               |
| 1562/1560        | 29   | 1562                  | 29   | 1579                                      | 67               | 1570                                | 31               |
|                  |      |                       |      | 1467                                      | 1                | 1463                                | 1                |
| 1401             | 45   | 1402                  | 22   | 1404                                      | 24               | 1396                                | 21               |
| 1389/1387        | 48   | 1389/1387             | 33   | 1386                                      | 52               | 1384                                | 16               |
|                  |      |                       |      | 1317                                      | 0.1              | 1313                                | 4                |
| 1314             | 24   | 1314                  | 18   | 1309                                      | 20               | 1305                                | 6                |
| 1280             | 21   | 1281                  | 30   | 1283                                      | 15               | 1278                                | 11               |
| 1210             | 21   | 1213/1210             | 40   | 1217                                      | 24               | 1212                                | 18               |
|                  |      |                       |      | 1203                                      | 5                | 1202                                | 5                |
|                  |      |                       |      | 1153                                      | 1                | 1154                                | 0.4              |
|                  |      |                       |      | 1119                                      | 2                | 1116                                | 1                |
| 1103             | 7    | 1102                  | 9    | 1098                                      | 6                | 1102                                | 6                |
|                  |      |                       |      | 1042                                      | 1                | 1045                                | 0                |
|                  |      |                       |      | 971                                       | 0.2              | 991                                 | 4                |
| 967              | 2    | 968                   | 3    | 966                                       | 2                | 976                                 | 1                |
|                  |      | 928                   | 2    | 930                                       | 1                | 935                                 | 1                |
| 904              | 6    | 904                   | 8    | 914                                       | 6                | 915                                 | 7                |
| 869              | 7    | 869                   | 6    | 861                                       | 5                | 867                                 | 5                |
|                  |      |                       |      | 855                                       | 1                | 860                                 | 0                |
| 811              | 63   | 813                   | 61   | 809                                       | 51               | 814                                 | 33               |
|                  |      |                       |      | 762                                       | 7                | 772                                 | 4                |
|                  |      |                       |      | 746                                       | 1                | 757                                 | 3                |
|                  |      |                       |      | 742                                       | 3                | 745                                 | 3                |
|                  |      |                       |      | 618                                       | 0.1              | 629                                 | 0.2              |
|                  |      |                       |      | 574                                       | 0.4              | 585                                 | 1                |
|                  |      |                       |      | 546                                       | 1                | 551                                 | 1                |
|                  |      |                       |      | 428                                       | 5                | 433                                 | 5                |
|                  |      |                       |      | 416                                       | 0.06             | 423                                 | 0.01             |
|                  |      |                       |      | 392                                       | 0.01             | 406                                 | 0.03             |
|                  |      |                       |      | 212                                       | 7                | 218                                 | 7                |
|                  |      |                       |      | 192                                       | 0.04             | 195                                 | 0.1              |

Table S5 Experimental wavenumbers ( $\nu$ ) and relative integrated intensities ( $I$ ) of the bands in the spectra of 7-azaindoyl radical generated upon UV ( $\lambda > 270$  nm) irradiation of 7-azaindole monomers isolated in Ar and n-H<sub>2</sub> matrices. The experimental spectra are compared with the theoretical spectrum [wavenumbers ( $\nu$ ) and absolute intensities ( $A$ )] calculated, at the DFT(B3LYP)/6-311++G(d,p) level, for the 7-azaindoyl radical. The theoretical wavenumbers were scaled by a single factor of 0.98. Integrated intensities of the experimental bands ( $I$ ) were normalized in such a way that their sum (over all the experimental bands reported in the table) is equal to the sum of absolute intensities of the assigned theoretical bands.

| Ar matrix        |      | H <sub>2</sub> matrix |      | DFT(B3LYP)<br>/6-311++G(d,p) |                  |
|------------------|------|-----------------------|------|------------------------------|------------------|
| <b>Radical</b>   |      |                       |      | <b>Radical</b>               |                  |
| $\nu$            | $I$  | $\nu$                 | $I$  | $\nu$                        | $A$              |
| cm <sup>-1</sup> | rel. | cm <sup>-1</sup>      | rel. | cm <sup>-1</sup>             | $\frac{km}{mol}$ |
|                  |      |                       |      | 3156                         | 9                |
|                  |      |                       |      | 3133                         | 13               |
|                  |      |                       |      | 3129                         | 6                |
|                  |      |                       |      | 3109                         | 9                |
|                  |      |                       |      | 3099                         | 10               |
|                  |      |                       |      | 1578                         | 39               |
| 1556             | 82   | 1555                  | 117  | 1563                         | 87               |
|                  |      |                       |      | 1471                         | 3                |
|                  |      |                       |      | 1450                         | 1                |
| 1372             | 16   | 1372                  | 6    | 1379                         | 19               |
| 1325             | 27   | 1325                  | 8    | 1331                         | 20               |
| 1299             | 19   | 1299                  | 22   | 1303                         | 26               |
| 1247             | 23   | 1246                  | 13   | 1253                         | 13               |
|                  |      |                       |      | 1215                         | 6                |
|                  |      |                       |      | 1184                         | 4                |
| 1158             | 17   | 1157                  | 11   | 1154                         | 9                |
| 1090             | 14   | 1089                  | 12   | 1088                         | 9                |
|                  |      |                       |      | 1037                         | 1                |
|                  |      |                       |      | 952                          | 0.5              |
|                  |      |                       |      | 946                          | 4                |
|                  |      |                       |      | 927                          | 0.1              |
|                  |      |                       |      | 887                          | 5                |
|                  |      |                       |      | 877                          | 5                |
| 840              | 10   | 839                   | 7    | 835                          | 5                |
| 786              | 48   | 786                   | 59   | 779                          | 67               |
|                  |      |                       |      | 756                          | 7                |
|                  |      |                       |      | 750                          | 0.3              |
|                  |      |                       |      | 713                          | 1                |
|                  |      |                       |      | 599                          | 5                |
|                  |      |                       |      | 553                          | 2                |
|                  |      |                       |      | 539                          | 0.2              |
|                  |      |                       |      | 490                          | 0.2              |
|                  |      |                       |      | 435                          | 6                |
|                  |      |                       |      | 403                          | 0.02             |
|                  |      |                       |      | 220                          | 1                |
|                  |      |                       |      | 201                          | 6                |

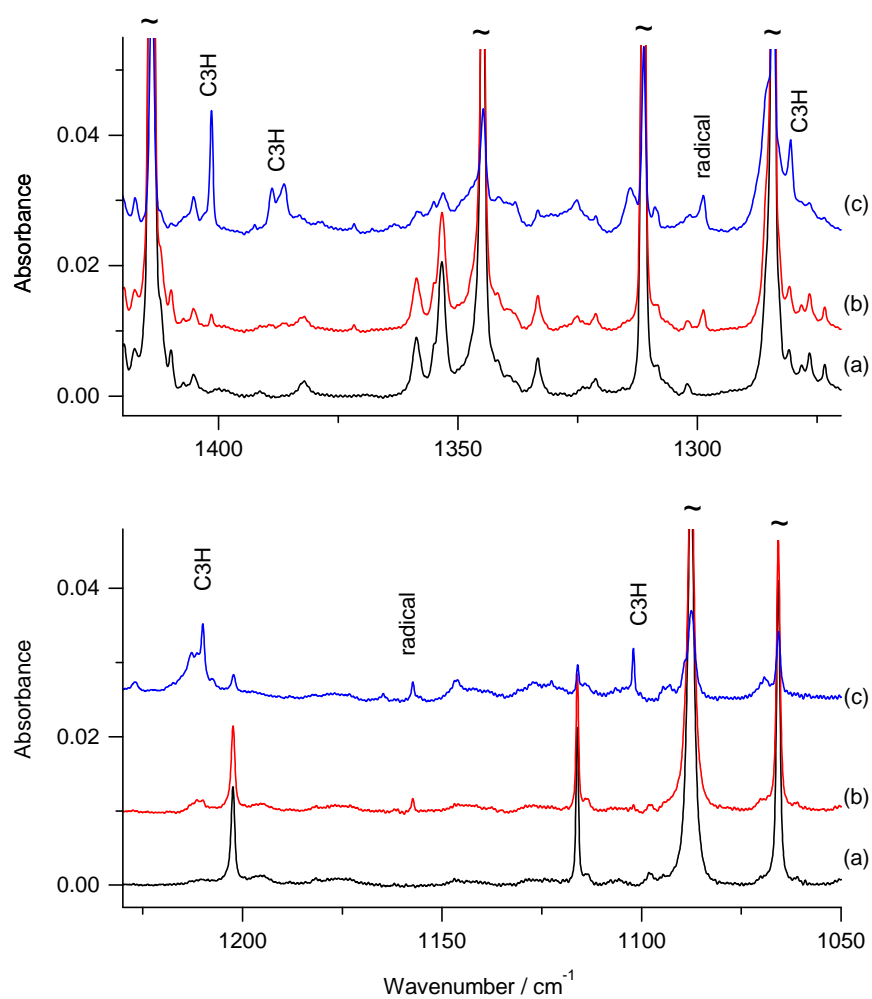

Figure S2. Fragments of the infrared spectra of 7-azaindole isolated in an n-H<sub>2</sub> matrix: (a) the spectrum recorded after deposition of the n-H<sub>2</sub> matrix and before any irradiation; (b) the spectrum recorded after 1 min. of UV ( $\lambda > 270$  nm) irradiation; (c) the spectrum recorded after 31 min. of UV ( $\lambda > 270$  nm) irradiation.
